# Supplementary material
Source: Springer Nature journal article supplement (https://www.springermedizin.de/resource/supplementary/12889_2013_6550_MOESM2_ESM.pdf/9498398)

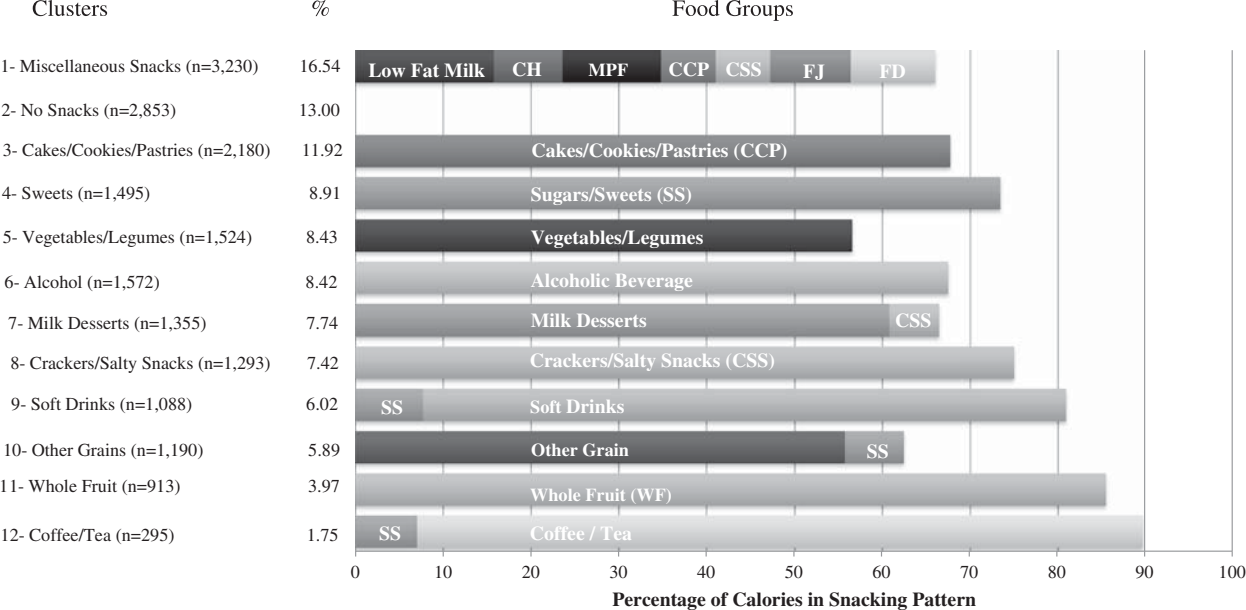

Supplement: MOESM2 [file 9498398]
